# Supplementary material for: Impact of Disease Factors of Patients with Psoriasis and Psoriatic Arthritis on Biologic Therapy Switching: Real-World Evidence from the CorEvitas Psoriasis Registry
Source: PubMed Central journal article supplement — Dermatol Ther (Heidelb). 2024 Sep 16;14(10):2805–25. doi: 10.1007/s13555-024-01258-1 (PMC11480299; doi:10.1007/s13555-024-01258-1), 2024-09-16
Supplement: 13555_2024_1258_MOESM1_ESM.pdf [file 13555_2024_1258_MOESM1_ESM.pdf]

**Impact of Disease Factors of Patients with Psoriasis and Psoriatic Arthritis on Biologic Therapy Switching: Real-World Evidence from the CorEvitas Psoriasis Registry**

Philip J. Mease<sup>1</sup>, Andrew Blauvelt<sup>2</sup>, Adam P. Sima<sup>3</sup>, Silky W. Beaty<sup>4</sup>, Robert Low<sup>4</sup>, Braulio Gomez<sup>4</sup>, Marie Gurrola<sup>3</sup>, Mark G. Lebwohl<sup>5</sup>

*<sup>1</sup>Department of Rheumatology, Swedish Medical Center/Providence St. Joseph Health and University of Washington, Seattle, WA, USA; <sup>2</sup>Oregon Medical Research Center, Portland, OR, USA; <sup>3</sup>CorEvitas, LLC, Waltham, MA, USA; <sup>4</sup>UCB, Inc., Smyrna, GA, USA; <sup>5</sup>Department of Dermatology, Icahn School of Medicine at Mt. Sinai, New York, NY, USA*

**Correspondence to:**

Mark G. Lebwohl, MD, FAAD

Dermatology, Mount Sinai – The Icahn School of Medicine at Mount Sinai

5 East 98th St 5th Fl

New York, NY 10029, USA

Email: lebwohl@aol.com

**SUPPLEMENTARY DATA**

**Supplementary Table 1** Eligible Medications for Enrollment<sup>a</sup>

|                            | <b>Class</b> | <b>Treatment</b>                                                                                                                                                                                                                      |
|----------------------------|--------------|---------------------------------------------------------------------------------------------------------------------------------------------------------------------------------------------------------------------------------------|
| <b>Biologic Treatments</b> | TNFi         | <ul style="list-style-type: none"> <li>• Adalimumab</li> <li>• Adalimumab Biosimilar</li> <li>• Certolizumab</li> <li>• Etanercept</li> <li>• Etanercept Biosimilar</li> <li>• Infliximab</li> <li>• Infliximab Biosimilar</li> </ul> |
|                            | IL-12/23i    | <ul style="list-style-type: none"> <li>• Ustekinumab</li> </ul>                                                                                                                                                                       |
|                            | IL-23i       | <ul style="list-style-type: none"> <li>• Guselkumab</li> <li>• Risankizumab</li> <li>• Tildrakizumab</li> </ul>                                                                                                                       |
|                            | IL-17i       | <ul style="list-style-type: none"> <li>• Bimekizumab</li> <li>• Brodalumab</li> <li>• Ixekizumab</li> <li>• Secukinumab</li> </ul>                                                                                                    |

<sup>a</sup>Eligible medications for enrollment included FDA-approved biologic and biosimilar treatments for PSO. FDA: Food and Drug Administration; i: inhibitor; IL: interleukin; PSO: psoriasis; TNF: tumor necrosis factor.

**Supplementary Table 2** HRs Estimating the Association Between Disease Factors at Follow-Up, Baseline Covariates, and Biologic Switch Over 30 Months Following Biologic Therapy Initiation

|                                                        | Unadjusted         |         | Adjusted <sup>a</sup> |         |
|--------------------------------------------------------|--------------------|---------|-----------------------|---------|
|                                                        | HR (95% CI)        | p value | HR (95% CI)           | p value |
| <b><i>Disease Factors at Follow-Up<sup>b</sup></i></b> |                    |         |                       |         |
| <b>PASI ≤10 (DLQI &gt;5 vs. DLQI ≤5)</b>               | 5.07 (4.17, 6.16)  | <0.001  | 5.25 (4.23, 6.51)     | <0.001  |
| <b>PASI &gt;10 (DLQI &gt;5 vs. DLQI ≤5)</b>            | 1.52 (0.96, 2.41)  | 0.076   | 1.70 (1.06, 2.71)     | 0.027   |
| <b>DLQI ≤5 (PASI &gt;10 vs. PASI ≤10)</b>              | 9.10 (5.97, 13.87) | <0.001  | 8.37 (5.42, 12.92)    | <0.001  |
| <b>DLQI &gt;5 (PASI &gt;10 vs. PASI ≤10)</b>           | 2.73 (2.08, 3.57)  | <0.001  | 2.71 (2.04, 3.60)     | <0.001  |
| <b><i>Baseline Covariates</i></b>                      |                    |         |                       |         |
| <b>Baseline Age (10-Year Increase)</b>                 | 0.86 (0.81, 0.92)  | <0.001  | 0.89 (0.82, 0.96)     | 0.002   |
| <b>Sex (Female vs. Male)</b>                           | 1.62 (1.35, 1.93)  | <0.001  | 1.49 (1.23, 1.81)     | <0.001  |
| <b>Race (white vs. Non-white)</b>                      | 1.67 (1.27, 2.18)  | <0.001  | 2.00 (1.51, 2.64)     | <0.001  |
| <b>Ethnicity (Hispanic vs. Non-Hispanic)</b>           | 1.50 (1.01, 2.23)  | 0.043   | 1.25 (0.84, 1.87)     | 0.275   |
| <b>Employment Status (Full-Time vs. Not Full-Time)</b> | 0.79 (0.66, 0.94)  | 0.007   | 0.98 (0.81, 1.19)     | 0.863   |
| <b>PSO Duration (10-Year Increase)</b>                 | 0.84 (0.78, 0.90)  | <0.001  | 0.91 (0.84, 0.99)     | 0.025   |
| <b><i>Disease Factors at Baseline</i></b>              |                    |         |                       |         |
| PASI ≤10 (DLQI >5 vs. DLQI ≤5)                         | 1.36 (1.11, 1.66)  | 0.003   | 0.76 (0.61, 0.94)     | 0.013   |
| PASI >10 (DLQI >5 vs. DLQI ≤5)                         | 1.30 (0.84, 2.03)  | 0.242   | 0.74 (0.47, 1.16)     | 0.193   |
| DLQI ≤5 (PASI >10 vs. PASI ≤10)                        | 0.80 (0.52, 1.23)  | 0.308   | 0.77 (0.50, 1.19)     | 0.243   |
| DLQI >5 (PASI >10 vs. PASI ≤10)                        | 0.77 (0.61, 0.97)  | 0.029   | 0.75 (0.59, 0.97)     | 0.026   |
| <b><i>BMI</i></b>                                      |                    |         |                       |         |
| Overweight vs. Underweight/Normal                      | 0.90 (0.67, 1.20)  | 0.462   | 1.18 (0.87, 1.59)     | 0.292   |
| ≥Class 1 Obese vs. Underweight/Normal                  | 1.14 (0.88, 1.48)  | 0.321   | 1.20 (0.92, 1.58)     | 0.183   |
| <b>Concomitant Diseases (Any vs. None)</b>             | 1.10 (0.90, 1.33)  | 0.307   | 1.08 (0.88, 1.32)     | 0.477   |
| <b><i>Study Period Indicator<sup>c</sup></i></b>       |                    |         |                       |         |
| Period 1–Period 2                                      | 1.85 (1.35, 2.55)  | <0.001  | 1.65 (1.20, 2.29)     | 0.002   |
| Period 1–Period 2                                      | 3.96 (2.86, 5.48)  | <0.001  | 3.16 (2.26, 4.41)     | <0.001  |
| Period 2–Period 3                                      | 2.13 (1.77, 2.57)  | <0.001  | 1.91 (1.58, 2.31)     | <0.001  |
| <b>Biologic History (Experienced vs. Naïve)</b>        | 0.97 (0.80, 1.19)  | 0.787   | 1.42 (1.15, 1.76)     | 0.001   |
| <b>Non-Biologic History (Experienced vs. Naïve)</b>    | 0.66 (0.54, 0.80)  | <0.001  | 0.73 (0.60, 0.90)     | 0.003   |
| <b>Topical Therapy History (Experienced vs. Naïve)</b> | 0.74 (0.40, 1.34)  | 0.315   | 0.70 (0.38, 1.30)     | 0.261   |
| <b>Phototherapy History (Experienced vs. Naïve)</b>    | 1.58 (1.27, 1.96)  | <0.001  | 1.60 (1.28, 2.00)     | <0.001  |

<sup>a</sup>Model also included age, sex, race, ethnicity, duration of PSO, biologic experience, baseline PASI/DLQI category, BMI, employment status, and number of concomitant diseases, as well as biologic, non-biologic, topical, and phototherapy history (separately); <sup>b</sup>PASI/DLQI was measured at all eligible follow-up registry visits; all other characteristics were measured at biologic initiation (time-dependent measures such as BMI were available at follow-up, but were not considered as time-varying measures in this study); <sup>c</sup>The model adjusted for PASI/DLQI at baseline at the temporal period of initiation, which included Period 1 (April 15, 2015–June 13, 2017), Period 2 (June 14, 2017–February 28, 2020), and Period 3 (March 1, 2020–August 4, 2022). BMI: body mass index; CI: confidence interval; DLQI: Dermatology Life Quality Index; HR: hazard ratio; PASI: Psoriasis Area Severity Index; PSO: psoriasis.

### Supplementary Figure 1 Patient Eligibility Flow Chart

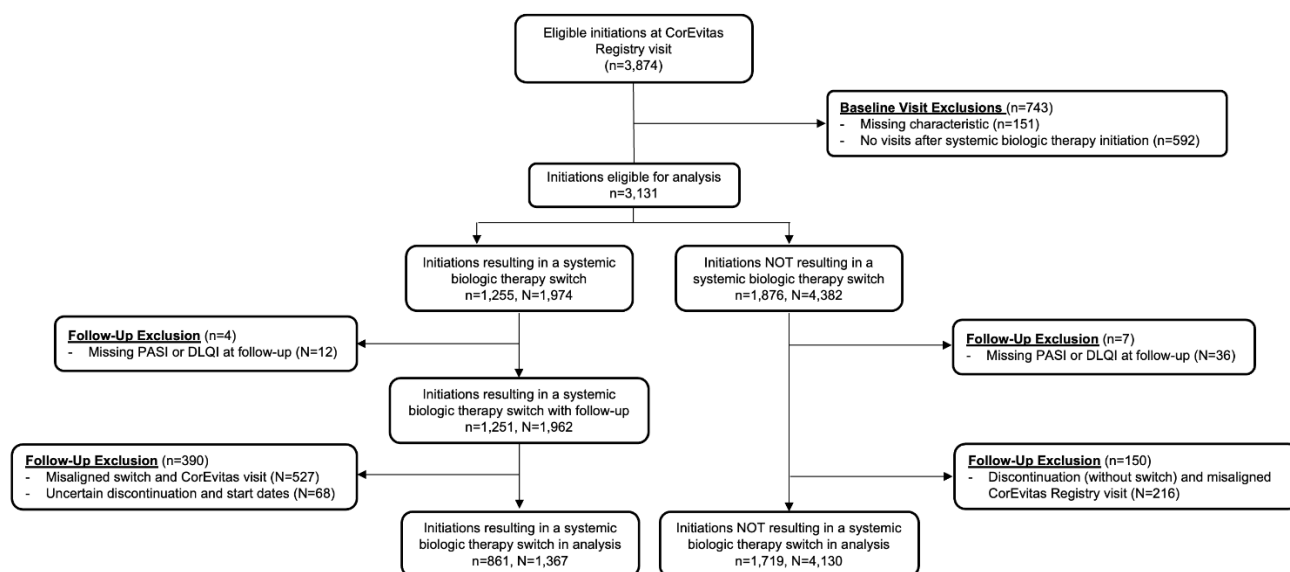

DLQI: Dermatology Life Quality Index; n: initiations; N: corresponding CorEvitas Registry visits; PASI: Psoriasis Area Severity Index.

### Supplementary Figure 2 Study Design

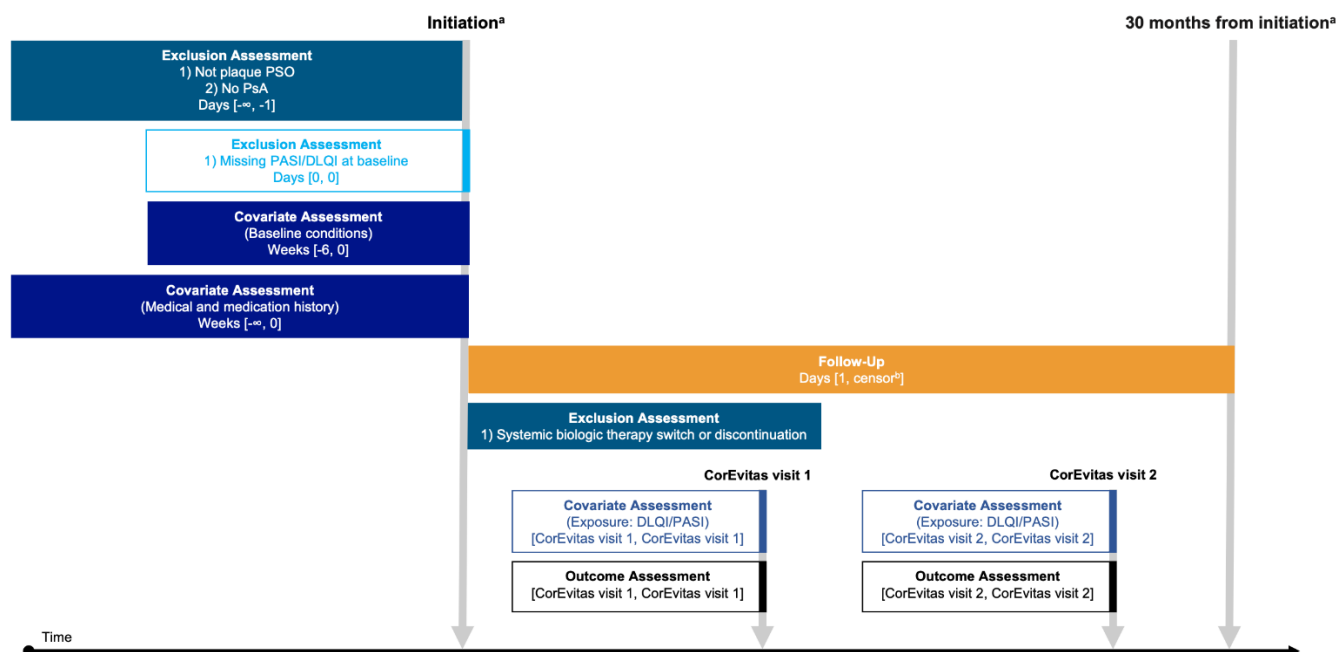

<sup>a</sup>Initiation is defined as the first use of any new biologic; <sup>b</sup>Each initiation was followed until there was a discontinuation/switch of the initial systemic biologic therapy, last registry follow-up, or 913 days (30 months) after initiation, whichever occurred first. DLQI: Dermatology Life Quality Index; PASI: Psoriasis Area Severity Index; PSA: psoriatic arthritis; PSO: psoriasis.
